# Supplementary material for: Sex-Dependent Effects of Eicosapentaenoic Acid on Hepatic Steatosis in UCP1 Knockout Mice
Source: MDPI journal article supplement (doi:10.3390/biomedicines9111549), 2021-10-27
Supplement: s1 [file s1]

# Supplementary Material

Table S1. Diet Composition, D08112003.

| Dietary Component                   | HF-EPA |          | HF     |          |
|-------------------------------------|--------|----------|--------|----------|
|                                     | gm     | kcal (%) | gm     | kcal (%) |
| Protein                             | 24     | 20       | 24     | 20       |
| Carbohydrate                        | 41     | 35       | 41     | 35       |
| Fat                                 | 24     | 45       | 24     | 45       |
| Total                               | 100    |          | 100    |          |
|                                     | gm     | kcal     | gm     | kcal     |
| Casein                              | 200    | 800      | 200    | 800      |
| L-Cystine                           | 3      | 12       | 3      | 12       |
| Corn Starch                         | 72.8   | 291      | 72.8   | 291      |
| Maltodextrin 10                     | 100    | 400      | 100    | 400      |
| Sucrose                             | 172.8  | 691      | 172.8  | 691      |
| Cellulose                           | 50     | 0        | 50     | 0        |
| Soybean Oil                         | 25     | 225      | 25     | 225      |
| Lard                                | 139.5  | 1256     | 177.5  | 1598     |
| AlaskOmega EE (820 mg EPA/g)        | 38     | 32       | 0      | 0        |
| Mineral Mix S10026                  | 10     | 0        | 10     | 0        |
| Di Calcium Phosphate                | 13     | 0        | 13     | 0        |
| Calcium Carbonate                   | 5.5    | 0        | 5.5    | 0        |
| Potassium Citrate, 1 H2O            | 16.5   | 0        | 16.5   | 0        |
| Vitamin Mix V10001                  | 10     | 40       | 10     | 40       |
| Choline Bitartrate                  | 2      | 0        | 2      | 0        |
| Vitamin E Acetate, 50% (500IU/gm)   | 0.13   | 0        | 0.13   | 0        |
| FD&C Yellow Dye #5                  | 0.05   | 0        | 0      | 0        |
| FD&C Red Dye #40                    | 0      | 0        | 0.025  | 0        |
| FD&C Blue Dye #1                    | 0      | 0        | 0.025  | 0        |
| Total                               | 858.27 | 4057     | 858.28 | 4057     |
| EPA content in the diet (g/kg diet) | 36     |          | 0      |          |

Table S2. Primer sequences used for qPCR.

| Gene          | Forward                  | Reverse                  |
|---------------|--------------------------|--------------------------|
| <i>Ucp2</i>   | CCAGAGAAGAGCACCAGTTC     | GGACCTAACACAATGACCAGAT   |
| <i>Ucp3</i>   | GATGTGGTGAAGGTCCGATT     | CTGGCGATGGTTCTGTAGG      |
| <i>Acaca</i>  | GCAGCAGTTACACCACATACA    | CATTACCTCAATCTCAGCATAGCA |
| <i>Fasn</i>   | TGTATCCTGCTGTCCAACCT     | GGCTTGTCCTGCTCTAACTG     |
| <i>Dgat2</i>  | CCTCATCGCCGCCTACTC       | GAGCCAGGTGACAGAGAAGAT    |
| <i>Ppara</i>  | ATCCACGAAGCCTACCTGAA     | AATCGGACCTCTGCCTCTT      |
| <i>Cpt1a</i>  | GAGACAGACACCATCCAACAC    | GAGCCAGACCTTGAAGTAACG    |
| <i>Cpt2</i>   | CAGCACAGCATCGTACCCA      | TCCCAATGCCGTTCTCAAAAT    |
| <i>Acadvl</i> | TGGCTCGGATGGCTATTCT      | TGCTGATGGCGGCTTCTA       |
| <i>Acat1</i>  | TCACGGCAGAAGCAGGAT       | GCACAATCTCAGCACGGAAG     |
| <i>Ehhadh</i> | TCATTCTAGCCGATACTCTTCC   | GTTACCAACAACGACTCCAATCT  |
| <i>Pex5</i>   | CAGGCAGAGTTGGAGGAGAT     | CTTGTCATAGGAAGCGGATGTG   |
| <i>Acox1</i>  | CGCCACCTTCAATCCAGAG      | TTCTTAACAGCCACCTCGTAAC   |
| <i>Gpd1</i>   | CGGAGACAAGCGGAAGGA       | CCAGAGGACAGCAAGGAAGT     |
| <i>Gpd2</i>   | TGAGTGGCAAGTTGGATATAATGG | GCTACACGCTACAAGATTCAGAA  |
